# Supplementary material
Source: Springer Nature journal article supplement (https://www.springermedizin.de/resource/supplementary/12865_2009_301_MOESM12_ESM.pdf/9427706)

**A**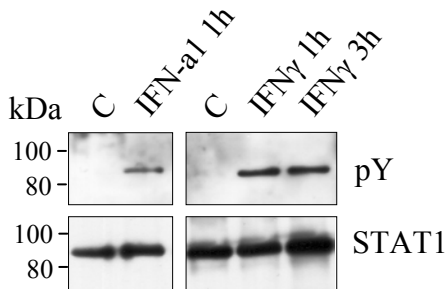**C**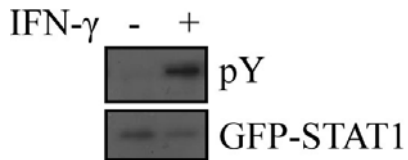**B**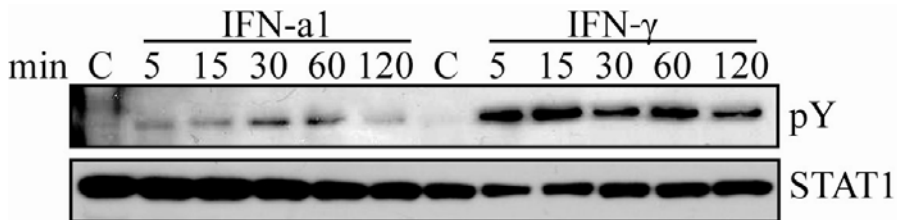

Supplement: MOESM12 [file 9427706]
